# Supplementary material for: Evidence for an iterative module in chain elongation on the azalomycin polyketide synthase
Source: publisher site journal article supplement (doi:10.3762/bjoc.12.206), 2016-10-11
Supplement: Additional file 1 [file 1860-5397-12-206-S1.pdf]

**Supporting Information**  
**for**  
**Evidence for an iterative module in chain elongation on the azalomycin**  
**polyketide synthase**

Hui Hong<sup>1</sup>, Yuhui Sun<sup>2</sup>, Yongjun Zhou<sup>1</sup>, Emily Stephens<sup>1</sup>, Markiyan Samborsky<sup>1</sup> and  
Peter F. Leadlay\*<sup>1</sup>

Address: <sup>1</sup>Department of Biochemistry, University of Cambridge, 80 Tennis Court Road,  
Cambridge, CB2 1GA, United Kingdom and <sup>2</sup>Key Laboratory of Combinatorial  
Biosynthesis and Drug Discovery, Wuhan University, Ministry of Education, and Wuhan  
University School of Pharmaceutical Sciences, Wuhan 430071, People's Republic of  
China

Email: Peter Leadlay\* - pfl10@cam.ac.uk

\*Corresponding author

**Details of all molecular biological materials and procedures, growth**  
**conditions and analytical data**

**1. Supplementary methods**

**1.1. General analytical procedures**

HPLC-MS analysis of *Streptomyces* sp. DSM 4137 secondary metabolites was performed using an HPLC (Agilent Technologies 1200 series) coupled to a Thermo Fisher LTQ mass spectrometer fitted with an electrospray ionization (ESI) source. The HPLC was fitted with a Prodigy 5 $\mu$  C18 column (4.6  $\times$  250 mm, Phenomenex). Samples were eluted using 20 mM ammonium acetate and MeOH with a gradient of 60% to 95%

MeOH over 30 min at a flow rate of 0.7 mL min<sup>-1</sup>. The mass spectrometer was run in positive ionization mode, scanning from  $m/z$  200 to 2000. Production of the polyketides azalomycin F3a, F4a was verified by MS2 on  $[M + H]^+$  ions at  $m/z$  1068.6 and 1082.6 respectively with a normalized collision energy of 30%.

ESI high resolution MS (ESI-HRMS) was carried out on a Thermo Scientific Orbitrap with 60,000 resolution.

## **1.2. Bacterial strains and culture conditions**

*Streptomyces* sp. DSM4137 was maintained on solid SFM medium (2% mannitol, 2% soya flour, 2% agar). For azalomycin production, strains of DSM4137 and mutant DSM $\Delta$ azl were cultured in TSBY at 30 °C and 200 rpm in a rotary incubator and harvested after 2–3 days. To check azalomycin production in *Streptomyces lividans* TK24, 6 day TSBY seed culture was inoculated onto SFM agar supplemented with 4-guanidinobutyramide at a concentration of 0.3 mg mL<sup>-1</sup>. 4-Guanidinobutyramide was prepared enzymatically [1]. The strain was grown at 30 °C for 8 days before analysis. *E. coli* strains were grown in Luria–Bertani (LB) broth (10% tryptone, 5% yeast extract, 10% NaCl) or agar (10% tryptone, 5% yeast extract, 10% NaCl, 2% agar) at 37 °C with appropriate antibiotic selection (kanamycin, at 50  $\mu$ g mL<sup>-1</sup>).

## **1.3. Materials, DNA isolation and manipulation**

Bacterial strains, plasmids and oligonucleotides (Invitrogen) used in this work are summarized in Tables S1, S2 and S3, respectively. Restriction endonucleases were purchased from New England Biolabs. T4 DNA ligase and alkaline phosphatase were purchased from Fermentas. All chemicals were from Sigma-Aldrich. Liquid cultures of DSM 4137 for isolation of genomic DNA were grown in tryptone soya broth (Difco). DNA isolation and manipulation in *Streptomyces*, and *E. coli* were carried out using standard protocols [2,3]. PCR amplifications were carried out using a Mastercycler (Eppendorf) and *Phusion* polymerase from New England Biolabs.

#### 1.4. Culture extraction for HPLC-MS analysis of metabolites

1 mL samples of culture broth of either *S. malaysiensis* DSM4137 or mutant DSM $\Delta$ azl were centrifuged at 20,000g for 15 min. The mycelia pellets were then extracted with 1 mL of methanol at 60 °C for 2 hours. The mixture was spun down and the clear methanol extract was evaporated to dryness and redissolved in 200  $\mu$ L of methanol. 10  $\mu$ L of the extract was analyzed by LC–MS.

SFM agar plates were extracted with 4.0 mL of methanol at 60 °C for 2 h. Debris was removed by centrifugation, and the organic phase was evaporated to dryness, dissolved in 200  $\mu$ L methanol, centrifuged, 50  $\mu$ L of the extract was analyzed by LC–MS.

#### 1.5. Gene disruption in *S. malaysiensis* DSM 4137

To construct the plasmid used for disruption of the *azl* gene cluster, two DNA fragments, a 7417 bp *Bcl*I-*Bam*HI fragment and a 9763 bp *Bam*HI fragment were cloned from cosmids DC10 and 4F8 covering both ends of the azalomycin biosynthetic gene cluster. The two fragments were then inserted into the unique *Bam*HI restriction site of the delivery vector pYH7 [4] with its natural orientation to yield the plasmid pYH10 (Figure S2). The plasmid pYH10 was introduced into DSM4137 by conjugation using ET12657/pUZ8002 as donor host strain on SFM plate. After incubation at 30 °C for 18 h, exconjugants were overlaid with 1 mL water containing 100  $\mu$ g apramycin and 5 mg nalidixic acid. Single colonies from this plate were transferred to an SFM plate with higher apramycin concentration (12.5  $\mu$ g mL<sup>-1</sup>) for further confirmation of antibiotic resistance. Confirmed colonies (Apr<sup>R</sup>) were propagated on SFM plate without antibiotic selection to allow the double cross-over to happen. To screen the double cross-over mutants, single colonies from non-selective plate were replicated on an SFM plate containing 12.5  $\mu$ g mL<sup>-1</sup> apramycin. The genomic DNA of the candidates with correct phenotype (Apr<sup>S</sup>) was isolated and used as PCR template and southern blot. To screen mutant with correct phenotype (Apr<sup>S</sup>), a pair of primers azl-1 and azl-2 was used in the 30  $\mu$ L PCR reaction using a program: initial denaturing at 94 °C for 5 min, followed by 30 cycles at 94 °C for 30 seconds, 55 °C for 40 seconds and 72 °C for 50 seconds, and completed by an additional 5 min at 72 °C. A specific product with the expected size of 473 bp was readily amplified in two individual colonies, while no products were

amplified by PCR when DSM4137 genomic DNA was used as template under the same conditions (Figure S3A). The PCR product was subsequently recovered from gel for sequencing and the result confirmed the 88346 bp DNA deletion between two homologous recombination arms occurred (Figure S2). Meanwhile, southern blot was also performed with the above 473 bp PCR product as a probe. Distinct bands were detected in all genomic DNA samples digested with *PvuII* (Figure S3B).

### **1.6. Heterologous expression of azalomycin in *S. lividans* TK24**

Heterologous production of azalomycin was carried out by expression of the entire *azl* biosynthetic gene cluster in *S. lividans* TK24. To capture the entire biosynthetic gene cluster, a PAC library (average insert size 145 kb) had previously been generated in *E. coli* DH10B using *Streptomyces malaysiensis* DSM4137 genomic DNA. Large genomic DNA fragments were ligated into pESAC13 vector between two *BamHI* sites. The genomic PAC library was constructed by Bio S&T Inc. (Montreal, Canada) and had been distributed in six 384-well plates (Bio S&T, Montreal). DNA had been extracted from each well then combined in pools of eight colonies to give 3 × 96-well plates of glycerol storage PAC DNA (2304 clones in total).

For screening of the library individual PAC clones were grown in 96 deep-well plates at 37 °C, 300 rpm overnight. For each row (8 wells), the cultures (800 µL) were pooled into a 15 mL plastic centrifuge tube (Greiner) and centrifuged (4,600g, 10 min, 4 °C). After DNA purification by alkaline lysis PCR reactions with primer pairs (aza-1F, aza-1R) complementary to the centre region of the azalomycin biosynthetic cluster were performed. Those samples that gave a band of the correct size were subjected to another round of PCR – with 2 pairs of primer, complementary to the left end (aza-Lf1, aza-Lr1) regions of the cluster and right end (aza-Rf1, aza-Rr1) regions of the cluster. Clones corresponding to the positive hits were grown, DNA was isolated from each individual clone and subjected to end-sequencing with the universal primers of SP6 and T7. The positive clone, named pYJ2, showed the *azl* gene cluster was centrally located within a 146 kb insert with 21 kb and 26 kb of flanking sequence to the right and left of the gene cluster respectively. To allow introduction of the cloned *azl* cluster into actinomycete strains that are intrinsically resistant to thiostrepton, the *tsr* resistance cassette of pYJ2

was replaced by the apramycin resistance cassette *aac(3)IV*, by using GeneBridges' Quick and Easy BAC Modification protocol based on Red/ET recombination. PCR and sequencing confirmed that the *aac(3)IV* had inserted at the correct site, replacing the *tsr* cassette. This newly-generated PAC clone was named pML1.

### **1.7. *E. coli* triparental mating and conjugation of *S. lividans* TK24**

*E. coli* cells DH10B/pML1 (Apr<sup>R</sup>), TOPO10/pR9604 (Carb<sup>R</sup>) and ET12567 (Cam<sup>R</sup>) were inoculated into 5 mL LB medium containing appropriate antibiotic and incubated overnight at 37 °C, 250 rpm. From the overnight culture 500 µL was inoculated into 10 mL LB medium containing half of the working concentration of appropriate antibiotic and incubated at 37 °C, 250 rpm until A<sub>600</sub> reached 0.4. The cells were harvested by centrifugation at 2,200g for 5 min and washed twice with 20 mL of LB medium. The supernatant was discarded and the pellet was resuspended in 500 µL of LB medium. 20 µL of each strain was dripped onto the same location on the LB agar plate lacking antibiotics so that the three strains were mixed together. After drying, the plates were incubated at 37 °C overnight for tri-parental conjugation. Next day, to select for *E. coli* ET12567 derivatives containing the PAC clone and the helper plasmid (pR9604) the cells from the spot were streaked onto fresh LB agar plates containing apramycin, chloramphenicol and carbenicillin antibiotics and incubated at 37 °C overnight. Single colonies were used to inoculate LB medium containing the antibiotics. To test the integrity of *azl* cluster in the ET cell, twelve PCR primer pairs (AZA1-12) with annealing sites approximately every 10 kb and unique within the *azl* cluster were designed. PCR analysis was carried out using the two flanking and twelve internal primer pairs to confirm the presence of the intact PAC clone in ET12567 cells.

Conjugation between *E. coli* ET12567 containing pML1 and the helper plasmid (pR9604), and *S. lividans* TK24 strain was carried out according to the protocol as described by Kieser et al. [3]. Mixtures of *Streptomyces* and *E. coli* were plated on SFM agar plates, and overlaid after 16 h with apramycin (5 µg mL<sup>-1</sup>) and nalidixic acid (25 µg mL<sup>-1</sup>). The putative ex-conjugates were streaked onto an SFM plate containing apramycin (50 µg mL<sup>-1</sup>) and nalidixic acid (25 µg mL<sup>-1</sup>). Apramycin resistant colonies were grown in TSBY liquid medium for genomic DNA purification. PCR analysis was carried out with

two flanking and twelve internal primer pairs. One of the clones harbouring the intact cluster was named *S. lividans* ML-A, and used in further experiments.

### **1.8. Genome sequencing of *Streptomyces aburaviensis* ATCC 31860**

Nextera shotgun and Nextera mate-pair libraries were constructed from high molecular weight genomic DNA isolated from *S. aburaviensis* ATCC 31860 using the manufacturer's protocol. Sequencing was carried out on an Illumina MiSeq platform using the Illumina V2 500 in 2 × 250 bp mode. Reads processed using a custom adapter trimming tool (fastq\_miseq\_trimmer). Read pairs were then preassembled using FLASH v1.2.11 (<https://ccb.jhu.edu/software/FLASH>). Several assemblies were carried out using either all or subsets of the input dataset, and the best assembly was selected using a score calculated from scaffold N50, edge and total number of contigs. ORFs were predicted ab initio using a customised version of the FGENESB pipeline V2.0 (2008) [www.softberry.com] and blasted against filtered NCBI NR and KEGG datasets. Customised linguistic analysis was used for transfer of gene annotations. Annotation results were saved in EMBL format and manually curated in Artemis (<http://www.sanger.ac.uk/science/tools/artemis>). The revised sequence of the ebelactone polyketide synthase genes has been deposited in the European Nucleic Acid Archive under accession number LT608336.

## **2. Supplementary Figures**

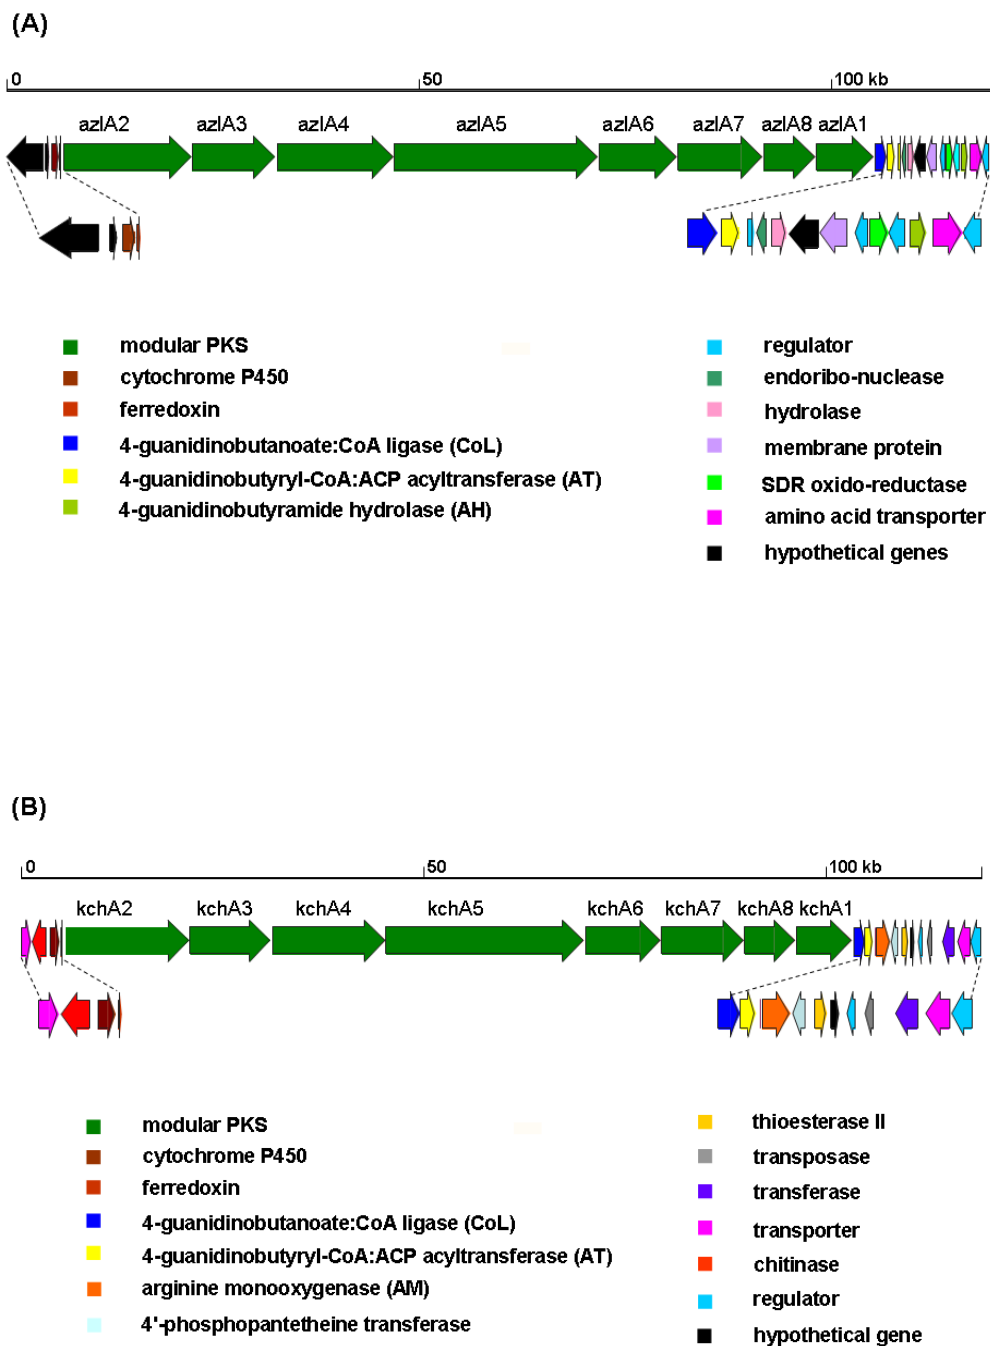

**Figure S1:** The organization of the biosynthetic gene clusters: A) for azalomycin in *S. malaysiensis* DSM 4137 and B) for kanchanamycin in *S. olivaceus* Tü 4018, and assignment of putative gene functions.

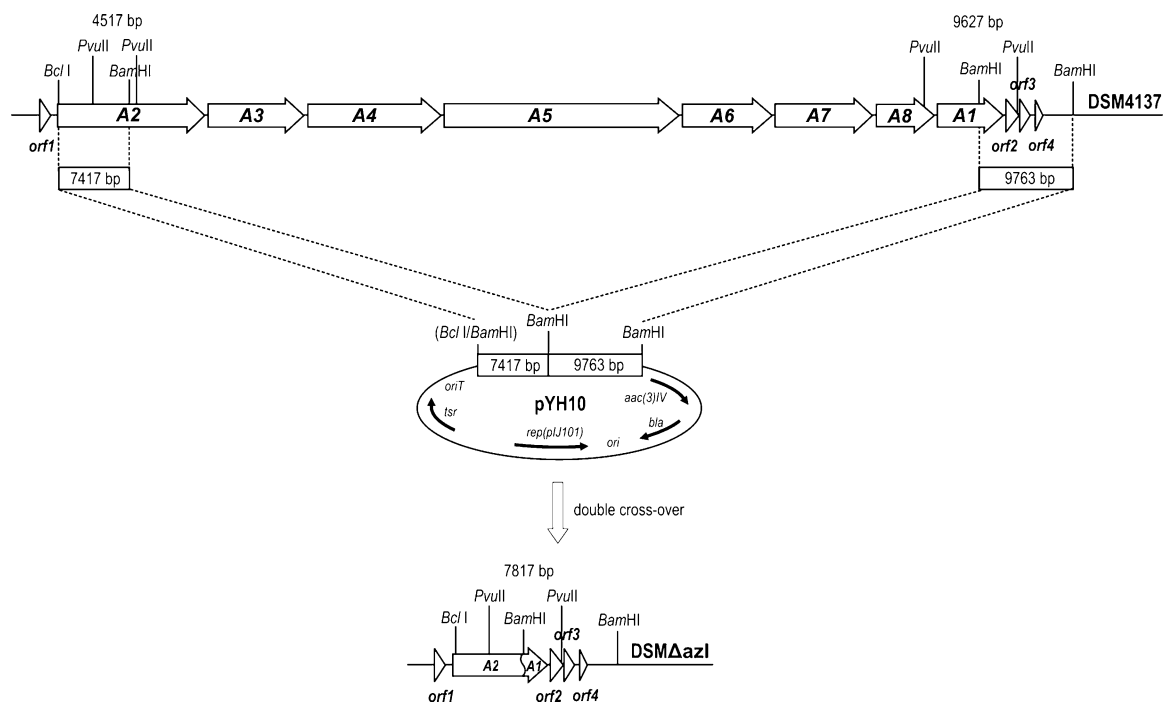

**Figure S2:** The organization of the azalomycin biosynthetic gene cluster before and after deletion. The numbers between *PvuII* sites represent the expected size of the fragments hybridizing to the probe (473 bp PCR product using primers azl-1 and azl-2) after digested with *PvuII*.



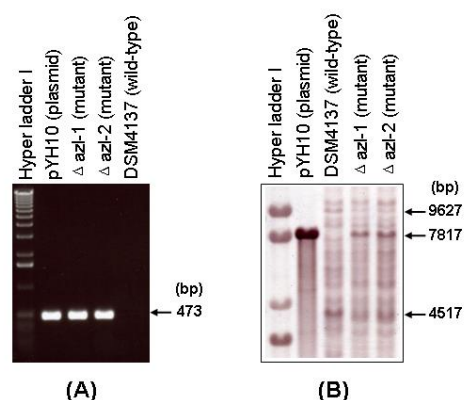

**Figure S3:** Confirmation of gene disruption by PCR (A) and Southern blot (B). A pair of primers *azl-1* and *azl-2* flanking deleted region was used for quick screening to identify double cross-over mutants. The plasmid pYH10 used for disruption of the *azl* cluster and chromosomal DNA isolated from wild-type and mutants were digested with *PvuII*.

### 3. Supplementary Tables

**Table S1: Bacterial strains used in this study.**

| Strain                              | Genotype/Characteristics                                                                                                                                                                                                          | Reference                                       |
|-------------------------------------|-----------------------------------------------------------------------------------------------------------------------------------------------------------------------------------------------------------------------------------|-------------------------------------------------|
| <i>E. coli</i><br>DH10B             | F <sup>-</sup> <i>mcrA</i> Δ( <i>mrr-hsdRMS-mcrBC</i> ),<br>Φ80 <i>lacZ</i> ΔM15, Δ <i>lacX74 recA1 endA1</i><br><i>araD139</i> Δ ( <i>ara leu</i> )7697 <i>galU galK rpsL nupG</i><br>λ <sup>-</sup><br>host for general cloning | Invitrogen                                      |
| <i>E. coli</i> DH10B/PAC<br>library | Contains DSM4137 PAC library clones<br><i>neo, tsr</i>                                                                                                                                                                            | Bio S&T,<br>Montreal                            |
| <i>E. coli</i> DH10B/pML1           | Contains PAC clone with <i>azl</i> gene cluster,<br><i>neo, tsr</i>                                                                                                                                                               | This<br>research:<br>PAC<br>modification<br>[5] |
| <i>E. coli</i><br>TOPO10/pR9604     | Helper strain in triparental mating                                                                                                                                                                                               |                                                 |

|                                   |                                                                                                                                                                                                                     |           |
|-----------------------------------|---------------------------------------------------------------------------------------------------------------------------------------------------------------------------------------------------------------------|-----------|
| ET12567                           | (F <sup>-</sup> <i>dam</i> -13::Tn9 <i>dcm</i> -6 <i>hsdM</i> <i>hsdR</i> <i>recF</i> 143 <i>zjj</i> -202::Tn10 <i>galK</i> 2 <i>galT</i> 22 <i>ara</i> 14 <i>pac</i> Y1 <i>xyl</i> -5 <i>leu</i> B6 <i>thi</i> -1) | [6]       |
| <i>S. malaysiensis</i> DSM4137    | Donor strain for conjugation between <i>E. coli</i> and <i>Streptomyces</i> in triparental mating                                                                                                                   | [1]       |
| DSM4137 Δ <i>azl</i>              | Azalomycin-producing strain                                                                                                                                                                                         |           |
| <i>Streptomyces lividans</i> TK24 | <i>azl</i> pks genes deletion mutant strain                                                                                                                                                                         | this work |
| <i>S. lividans</i> ML-A           | Heterologous host for azalomycin production                                                                                                                                                                         | [7]       |
|                                   | Heterologous host with integrated into the genome the entire azalomycin biosynthetic gene cluster                                                                                                                   | this work |

**Table S2: Plasmids used in this work.**

| Plasmid | Genotype/Characteristics                                                                                                       | Reference |
|---------|--------------------------------------------------------------------------------------------------------------------------------|-----------|
| pYH7    | <i>E.coli-Streptomyces</i> shuttle vector                                                                                      | [4]       |
| pYH10   | <i>azl</i> pks genes disruption construct in which a 88346 bp internal fragment comprising of <i>azl</i> pks genes was deleted | this work |
| pESAC13 | <i>bla</i> , <i>neo</i> , <i>tsr</i> , <i>parA</i> , <i>parB</i> , <i>sacB</i> , <i>oriT</i> PAC library                       | [5]       |
| pIJ773  | <i>aac(3)IV</i>                                                                                                                | [8]       |
| pYJ2    | pESAC13 based PAC vector with cloned azalomycin biosynthetic gene                                                              | this work |
| pML1    | the <i>tsr</i> resistance cassette of pYJ2 was replaced by the apramycin resistance cassette <i>aac(3)IV</i>                   | this work |

**Table S3: Oligonucleotide primers used in this work.**

| Primer                                        | Nucleotide sequence (5' to 3') |
|-----------------------------------------------|--------------------------------|
| <i>Primers used for PAC library screening</i> |                                |
| aza-1F                                        | TCTGGCCTCCTTTTCATTCTTCAGTC     |
| aza-1R                                        | TCGAGACCGAAGGTGTACGAGATAC      |
| aza-Lf1                                       | AACAAGAGCGGGAACAGGGACAG        |
| aza-Lr1                                       | AGTCTCAACTTCTCGCGGTGGTAC       |
| aza-Rf1                                       | TCTGGACGCCTATATGGAAGGTCTC      |
| aza-Rr1                                       | TCTGCTCACCGATGTCAGTTTCGAG      |
| AZA-1f                                        | TCGACGGGGAGCGCAGTTCCTTCTC      |
| AZA-1r                                        | TTCACCAACCAGCCCTGGCAGCTG       |
| AZA-2f                                        | ACGAACGCGCATGTGATCCTGGAG       |
| AZA-2r                                        | ACCCTCAACACCACGCAACACAC        |
| AZA-3f                                        | TCACGGTGGTTCCCTGGCTGCTCTC      |
| AZA-3r                                        | TGAACGCCGTCTGGTTCAGCAACTC      |
| AZA-4f                                        | TGTTGTTGGAAGTGTGGAGCTACTG      |

---

|                                                                                 |                                                                                |
|---------------------------------------------------------------------------------|--------------------------------------------------------------------------------|
| AZA-4r                                                                          | AACTCGTCGGCGTCGTAGAGGAAG                                                       |
| AZA-5f                                                                          | TCCAGAAGGTGGCGGATACATGGAC                                                      |
| AZA-5r                                                                          | AATATCGATTCCCAGCCCACCG                                                         |
| AZA-6f                                                                          | TCGGTGGAGTGGGAGTCCGTCTTC                                                       |
| AZA-6r                                                                          | ACGTGGTAGCGCCAGTTGTCGAT                                                        |
| AZA-7f                                                                          | AGCCTCGCGGCAGCGTTCTGATC                                                        |
| AZA-7r                                                                          | TCCGGCGTAGGAGGAGAAGAGGATG                                                      |
| AZA-8f                                                                          | ATCTTCATCGAGGTGAGCCCGCATC                                                      |
| AZA-8r                                                                          | TGGTCGCGGTTGTTGCGGTGATAC                                                       |
| AZA-9f                                                                          | AACGCGGGCGTGACCAGGTTCTTC                                                       |
| AZA-9r                                                                          | AGCACCTCGGTCAGCGAGGCGTTTC                                                      |
| AZA-10f                                                                         | ATGACTCGCTCTTCCGGCTGGACTG                                                      |
| AZA-10r                                                                         | AACACCAGGTAGGAGTCGTCGAA                                                        |
| AZA-11f                                                                         | ATCGTCGGGATGAGCTGCCGTTTC                                                       |
| AZA-11r                                                                         | TCGAAGCCGAAGGTGTAGGAGATG                                                       |
| AZA-12f                                                                         | TGGACATGGTGCTGGACTCGCTC                                                        |
| AZA-12r                                                                         | CGCGCCGCATGGTGAACACGTTCTT                                                      |
| Sp6                                                                             | TATTTAGGTGACACTATAG (for sequencing only)                                      |
| T7                                                                              | TAATACGACTCACTATAGGG (for sequencing only)                                     |
| <i>Primers for amplification /confirmation of apramycin resistance cassette</i> |                                                                                |
| AprR_F                                                                          | AGGCGAATACTTCATATGCGGGATCGACCGCGCGGGTCCC<br>GGACGGGGAAGTACGCCGTTGGATACACCAAG   |
| AprR_R                                                                          | ATCACTGACGAATCGAGGTGAGGAACCGAGCGTCCGAGG<br>AACAGAGGCGCTTATGAGCTCAGCCAATCGACTGG |
| Confirm_APR                                                                     | TCAACTGGGCCGAGATCCGTTGA (for sequencing only)                                  |
| Re-confirm_APR                                                                  | AGCTGACCGATGAGCTCGGCTTTTC (for sequencing only)                                |
| <i>Primers for confirmation of phage 31 attachment site</i>                     |                                                                                |
| attL_F                                                                          | ACGATGTAGGTACGGTCTCGAAG                                                        |
| attL_R                                                                          | ATGACGTTTCCCTGCCGGAAGAC                                                        |
| attR_F                                                                          | AGGACGGGTGTGGTCCCATGATC                                                        |
| attR_R                                                                          | CATCATGATGGACCAGATGGGTGAG                                                      |
| <i>Primers for PCR screening of DSM4137 <math>\Delta</math>azl mutants</i>      |                                                                                |
| azl-1                                                                           | GGGTTCCGTCGTGGTGTC                                                             |
| Azl-2                                                                           | GAGGTTGTCCAGGGTGCC                                                             |

---

## References

- [1]. H. Hong, T. Fill, P. F. Leadlay, *Angew. Chem., Int. Ed.* **2013**, 52, 13096 – 13099.
- [2]. J. Sambrook, D. W. Russell, *Molecular Cloning: A Laboratory Manual*, 3rd ed. Cold Spring Harbor Laboratory Press, New York, **2001**.
- [3]. T. Kieser, M. Bibb, M. Buttner, K. F. Chater, D. A. Hopwood, *Practical Streptomyces Genetics*. The John Innes Foundation, Norwich, **2001**.

- [4]. Sun, Y.H., He, X.Y., Liang, J.D., Zhou, X.F., and Deng, Z.X. (2008). Analysis of functions in plasmid pHZ1358 influencing its genetic and structural stability in *Streptomyces lividans* 1326. *Appl. Microbiol. Biotechnol.* 82, 303-310.
- [5]. A. C. Jones, B. Gust, A. Kulik, L. Heide, M. J. Buttner, M. J. Bibb, *PLoS ONE* **2013**, 8, e69319.
- [6]. D. J. MacNeil, K. M. Gewain, C. L. Ruby, G. Dezeny, P. H. Gibbons, T. MacNeil, *Gene* **1992**, 111, 61-68.
- [7]. Hopwood D, Kieser T, Wright H & Bibb M (1983) Plasmids, Recombination and Chromosome Mapping in *Streptomyces lividans* 66. *Journal of General Microbiology* **129**: 22257–2269.
- [8]. Gust B, Challis GL, Fowler K, Kieser T & Chater KF (2003). PCR-targeted *Streptomyces* gene replacement identifies a protein domain needed for biosynthesis of the sesquiterpene soil odor geosmin. *Proc Natl Acad Sci USA* **100**:1541–1546.
